# Supplementary material for: Integrated Multiregional Analysis Proposing a New Model of Colorectal Cancer Evolution
Source: PubMed Central journal article supplement (PMC4758664; doi:10.1371/journal.pgen.1005778), 2016-02-18

# Hypermethylation

Within CpG Islands

Outside of CpG Islands

ALL (n=271)

non CIMP (n=196)

CIMP (n=75)

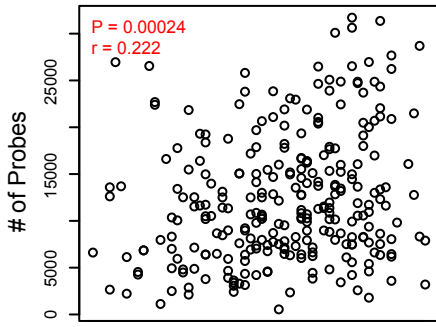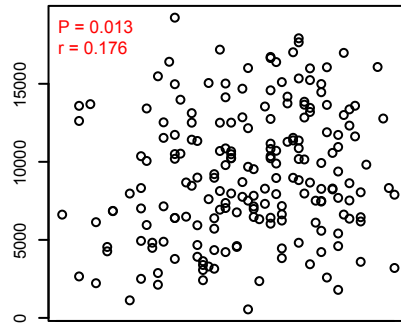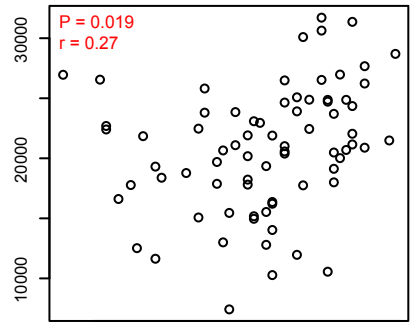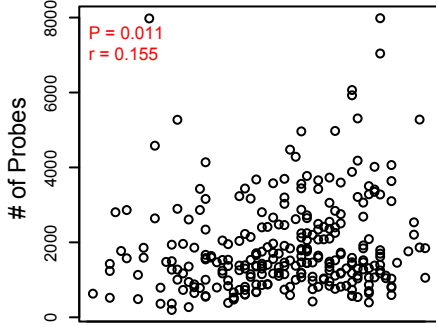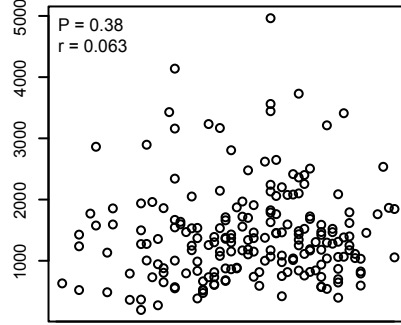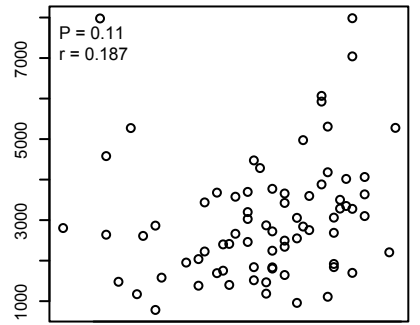

# Hypomethylation

Within CpG Islands

Outside of CpG Islands

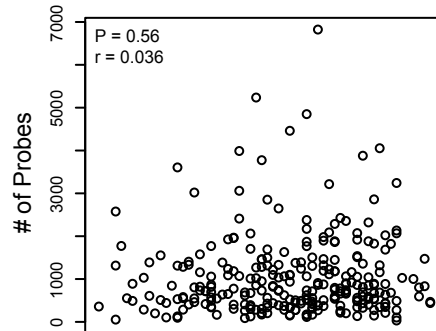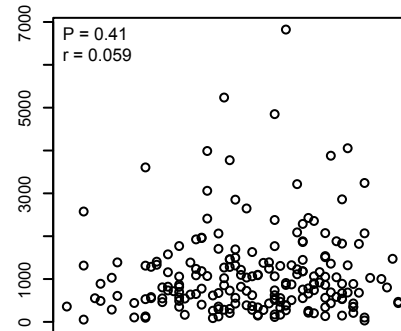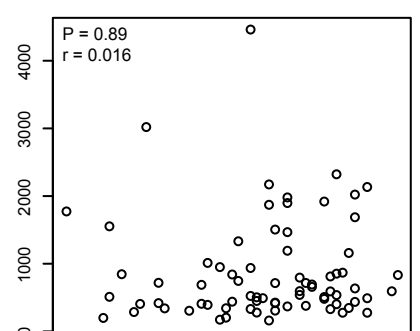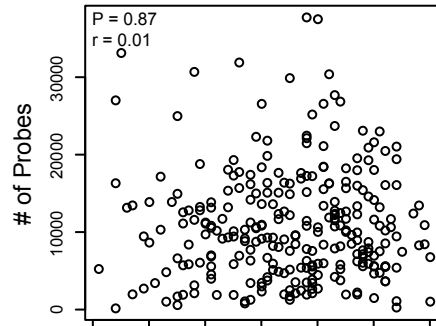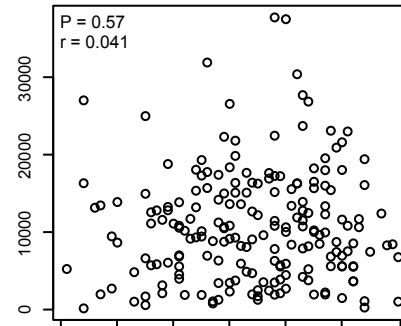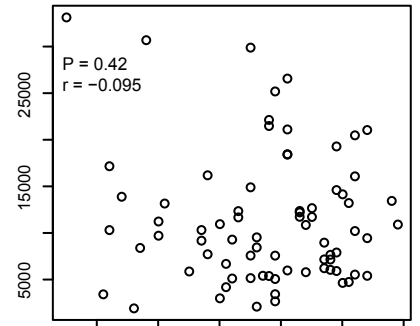

Supplement: pgen.1005778.s015.pdf [file pgen.1005778.s015.pdf]
