# Supplementary material for: Integrated Multiregional Analysis Proposing a New Model of Colorectal Cancer Evolution
Source: PubMed Central journal article supplement (PMC4758664; doi:10.1371/journal.pgen.1005778), 2016-02-18

**A**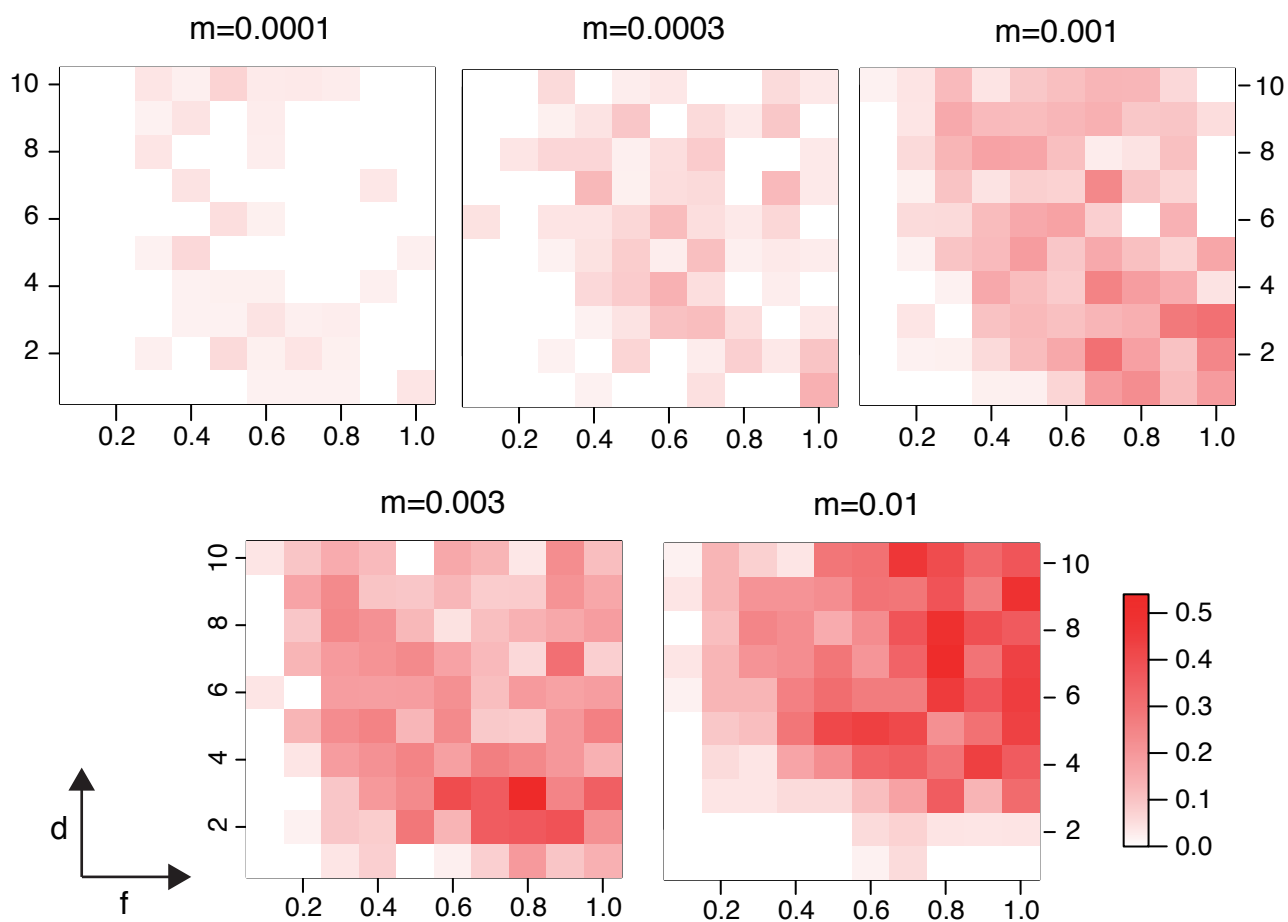**B**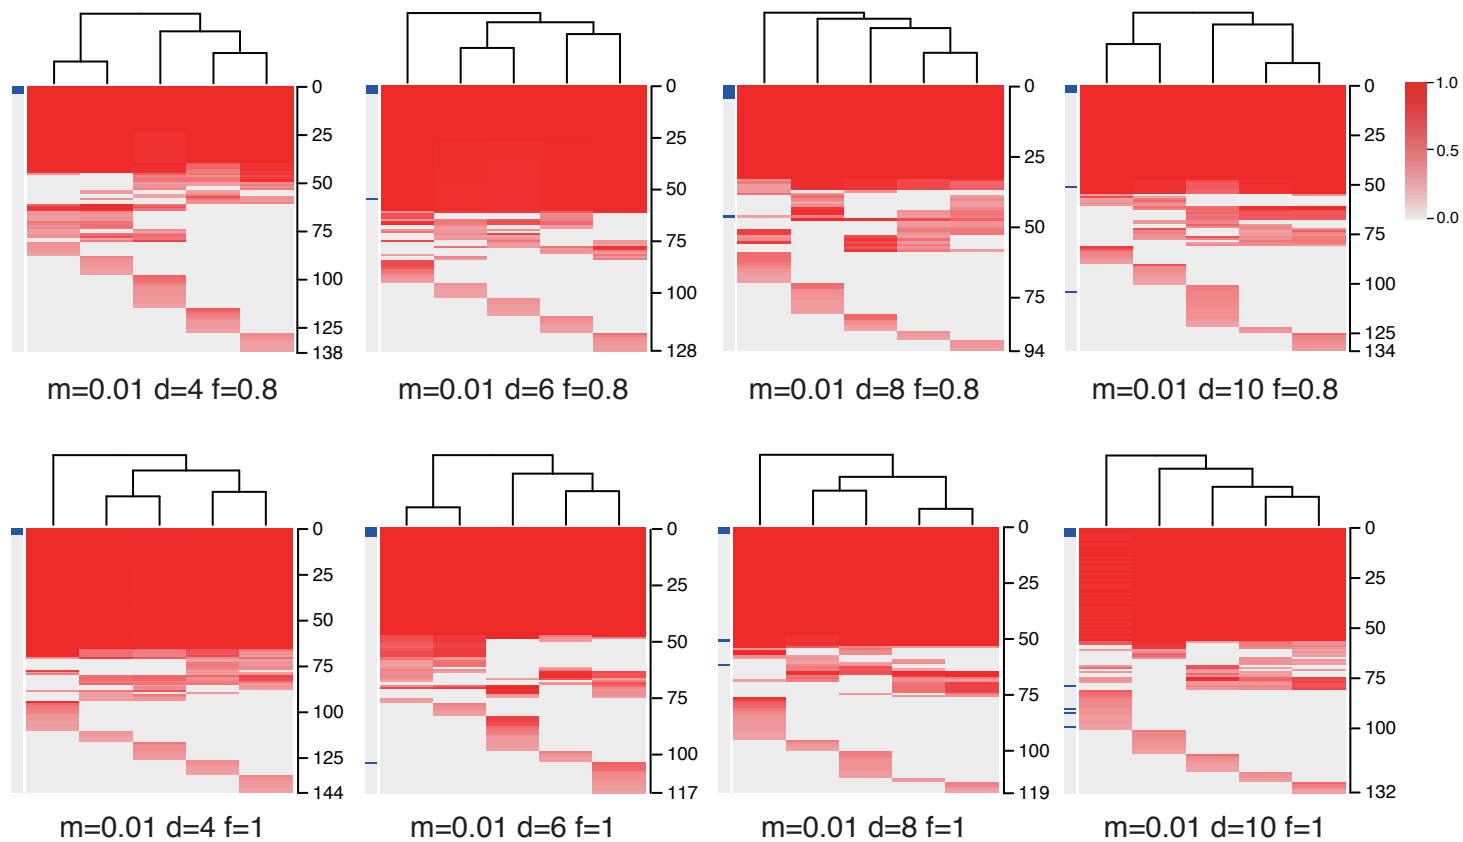

Supplement: pgen.1005778.s018.pdf [file pgen.1005778.s018.pdf]
